# Supplementary material for: Study of the Microbiome of the Cretan Sour Cream Staka Using Amplicon Sequencing and Shotgun Metagenomics and Isolation of Novel Strains with an Important Antimicrobial Potential
Source: MDPI journal article supplement (doi:10.3390/foods13071129), 2024-04-08
Supplement: s1 [file s1]

**Supplementary Table S1.** Bacteria fingerprinting and identification

| <b>Bacterial<br/>Rep-PCR Cluster</b> | <b>Identification by 16S rDNA<br/>sequencing</b> | <b>Number of isolates</b> | <b>Staka sample</b> |
|--------------------------------------|--------------------------------------------------|---------------------------|---------------------|
| C1                                   | <i>Leuconostoc pseudomesenteroides</i>           | 5                         | 2, 3                |
| C2                                   | <i>Pseudomonas</i> spp.                          | 1                         | 1                   |
| C3                                   | <i>Leuconostoc pseudomesenteroides</i>           | 4                         | 1, 2, 3             |
| C4                                   | <i>Leuconostoc pseudomesenteroides</i>           | 1                         | 2                   |
| C5                                   | <i>Leuconostoc pseudomesenteroides</i>           | 3                         | 1                   |
| C6                                   | <i>Leuconostoc pseudomesenteroides</i>           | 1                         | 3                   |
| C7                                   | <i>Enterococcus faecium</i>                      | 1                         | 1                   |
| C8                                   | <i>Leuconostoc pseudomesenteroides</i>           | 1                         | 2                   |
| C9                                   | <i>Leuconostoc pseudomesenteroides</i>           | 4                         | 1                   |
| C10                                  | <i>Pseudomonas</i> spp.                          | 2                         | 1                   |
| C11                                  | <i>Enterococcus faecium</i>                      | 1                         | 2                   |
| C12                                  | <i>Enterococcus faecium</i>                      | 10                        | 1, 2                |
| C13                                  | <i>Enterococcus faecium</i>                      | 15                        | 1, 2                |
| C14                                  | <i>Enterococcus faecium</i>                      | 6                         | 2                   |
| C15                                  | <i>Enterococcus faecalis</i>                     | 4                         | 3                   |
| C16                                  | <i>Enterococcus faecalis</i>                     | 2                         | 2, 3                |
| C17                                  | <i>Enterococcus faecalis</i>                     | 2                         | 3                   |
| C18                                  | <i>Enterococcus faecalis</i>                     | 1                         | 3                   |
| C19                                  | <i>Lactacaseibacillus paracasei</i>              | 5                         | 2, 3, 4             |
| C20                                  | <i>Enterococcus faecalis</i>                     | 3                         | 4                   |
| C21                                  | <i>Leuconostoc pseudomesenteroides</i>           | 1                         | 3                   |
| C22                                  | <i>Enterococcus faecalis</i>                     | 2                         | 3                   |
| C23                                  | <i>Enterococcus faecium</i>                      | 1                         | 3                   |
| C24                                  | <i>Enterococcus faecalis</i>                     | 1                         | 3                   |
| C25                                  | <i>Enterococcus faecalis</i>                     | 1                         | 3                   |

|     |                                           |   |      |
|-----|-------------------------------------------|---|------|
| C26 | <i>Hafnia paralvei</i>                    | 6 | 3    |
| C27 | <i>Enterococcus faecium</i>               | 6 | 3    |
| C28 | <i>Enterococcus faecium</i>               | 7 | 2, 3 |
| C29 | <i>Enterococcus faecalis</i>              | 2 | 3    |
| C30 | <i>Leuconostoc pseudomesenteroides</i>    | 1 | 1    |
| C31 | <i>Hafnia paralvei</i>                    | 1 | 1    |
| C32 | <i>Enterococcus faecalis</i>              | 1 | 2    |
| C33 | <i>Serratia liquefaciens</i>              | 1 | 1    |
| C34 | <i>Serratia liquefaciens</i>              | 5 | 1    |
| C35 | <i>Enterococcus faecium</i>               | 7 | 1, 3 |
| C36 | <i>Pseudomonas spp.</i>                   | 2 | 1    |
| C37 | <i>Loigolactobacillus coryniformis</i>    | 1 | 2    |
| C38 | <i>Bacillus subtilis</i>                  | 6 | 4    |
| C39 | <i>Latilactobacillus curvatus</i>         | 1 | 2    |
| C40 | <i>Hafnia paralvei</i>                    | 1 | 1    |
| C41 | <i>Streptococcus thermophilus</i>         | 1 | 2    |
| C42 | <i>Companilactobacillus versmoldensis</i> | 3 | 4    |
| C43 | <i>Hafnia paralvei</i>                    | 1 | 3    |
| C44 | <i>Enterococcus faecalis</i>              | 2 | 3    |
| C45 | <i>Latilactobacillus curvatus</i>         | 1 | 2    |
| C46 | <i>Enterococcus faecalis</i>              | 1 | 3    |
| C47 | <i>Hafnia paralvei</i>                    | 4 | 1, 3 |
| C48 | <i>Enterococcus faecalis</i>              | 1 | 3    |
| C49 | <i>Enterococcus faecalis</i>              | 1 | 1    |

**Supplementary Table S2.** Antimicrobial activity of the Staka bacterial isolates against 20 indicator strains

| <b>Producer strain</b><br><b>ACA-DC number</b> | <b>Target strain (growth medium-mm inhibition zone)</b>                                   |                                                                                                                    |                                                                                                             |
|------------------------------------------------|-------------------------------------------------------------------------------------------|--------------------------------------------------------------------------------------------------------------------|-------------------------------------------------------------------------------------------------------------|
|                                                | <b>LAB</b>                                                                                | <b>Pathogenic streptococci</b>                                                                                     | <b>Other spoilage and pathogenic bacteria</b>                                                               |
| <i>L. paracasei</i> 1119                       | nd                                                                                        | nd                                                                                                                 | <i>P. aeruginosa</i> FMCC B-26 (mye-bl)                                                                     |
| <i>L. curvatus</i> 1135                        | <i>S. thermophilus</i> ACA-DC 4 (MRS-11)                                                  | <i>S. pneumoniae</i> LMG 14545 <sup>T</sup> (MRS-9)                                                                | nd                                                                                                          |
| <i>L. paracasei</i> 1260                       | <i>L. sakei</i> ACA-DC 2313 (MRS-9);<br><i>S. thermophilus</i> ACA-DC 4 (MRS-12)          | <i>S. oralis</i> LMG 14532 <sup>T</sup> (MRS-8t)                                                                   | nd                                                                                                          |
| <i>C. versmoldensis</i> 1262                   | <i>S. thermophilus</i> ACA-DC 4 (MRS-12)                                                  | <i>S. oralis</i> LMG 14532 <sup>T</sup> (MRS-9t)                                                                   | nd                                                                                                          |
| <i>L. coryniformis</i> 1251                    | <i>S. thermophilus</i> ACA-DC 4 (MRS-12)                                                  | <i>S. oralis</i> LMG 14532 <sup>T</sup> (MRS-7t);<br><i>S. pneumoniae</i> LMG 14545 <sup>T</sup> (MRS-8t, mye-10t) | nd                                                                                                          |
| <i>L. pseudomesenteroides</i> 1128             | <i>S. thermophilus</i> ACA-DC 4 (MRS-11)                                                  | <i>S. pneumoniae</i> LMG 14545 <sup>T</sup> (MRS-9t)                                                               | nd                                                                                                          |
| <i>L. pseudomesenteroides</i> 1130             | <i>S. thermophilus</i> ACA-DC 4 (MRS-11)                                                  | <i>S. oralis</i> LMG 14532 <sup>T</sup> (MRS-9t);<br><i>S. pneumoniae</i> LMG 14545 <sup>T</sup> (MRS-9)           | nd                                                                                                          |
| <i>L. pseudomesenteroides</i> 1131             | <i>S. thermophilus</i> ACA-DC 4 (MRS-11)                                                  | <i>S. pneumoniae</i> LMG 14545 <sup>T</sup> (MRS-9t)                                                               | nd                                                                                                          |
| <i>L. pseudomesenteroides</i> 1145             | nd                                                                                        | nd                                                                                                                 | <i>P. aeruginosa</i> FMCC B-26 (mye-9)                                                                      |
| <i>L. pseudomesenteroides</i> 1249             | <i>S. thermophilus</i> ACA-DC 4 (MRS-12)                                                  | <i>S. pneumoniae</i> LMG 14545 <sup>T</sup> (MRS-7t)                                                               | nd                                                                                                          |
| <i>E. faecium</i> 1117                         | <i>S. thermophilus</i> ACA-DC 4 (M17-9)                                                   | nd                                                                                                                 | <i>P. aeruginosa</i> FMCC B-26 (M17-bl, mye-bl)                                                             |
| <i>E. faecium</i> 1138                         | <i>L. sakei</i> ACA-DC 2313 (MRS-18; mye-15);<br><i>S. thermophilus</i> ACA-DC 4 (MRS-11) | nd                                                                                                                 | <i>L. innocua</i> LMG 11387 <sup>T</sup> (MRS-20, mye-15);<br><i>L. innocua</i> LMG 13568 (MRS-20, mye-15); |

|                         |                                                                                                                                            |    |                                                                                                                                                            |
|-------------------------|--------------------------------------------------------------------------------------------------------------------------------------------|----|------------------------------------------------------------------------------------------------------------------------------------------------------------|
|                         |                                                                                                                                            |    | <i>L. welshimeri</i> 15008 (MRS-15, mye-12)                                                                                                                |
| <i>E. faecium</i> 1154  | <i>L. sakei</i> ACA-DC 2313 (MRS-18; mye-18);<br><i>S. thermophilus</i> ACA-DC 4 (MRS-15);<br><i>E. faecalis</i> LMG 11396 (MRS-9; mye-9)  | nd | <i>L. innocua</i> LMG 11387 <sup>T</sup> (MRS-12, mye-12);<br><i>L. innocua</i> LMG 13568 (MRS-13, mye-13);<br><i>L. welshimeri</i> 15008 (MRS-11, mye-12) |
| <i>E. faecalis</i> 1168 | <i>S. thermophilus</i> ACA-DC 4 (M17-15);<br><i>E. faecalis</i> LMG 11396 (M17-11)                                                         | nd | nd                                                                                                                                                         |
| <i>E. faecalis</i> 1169 | <i>S. thermophilus</i> ACA-DC 4 (M17-15);<br><i>E. faecalis</i> LMG 11396 (M17-11)                                                         | nd | nd                                                                                                                                                         |
| <i>E. faecalis</i> 1172 | <i>S. thermophilus</i> ACA-DC 4 (M17-15);<br><i>E. faecalis</i> LMG 11396 (M17-11)                                                         | nd | nd                                                                                                                                                         |
| <i>E. faecium</i> 1187  | <i>L. sakei</i> ACA-DC 2313 (MRS-15, mye-18);<br><i>S. thermophilus</i> ACA-DC 4 (M17-15);<br><i>E. faecalis</i> LMG 11396 (mye-9)         | nd | <i>L. innocua</i> LMG 11387 <sup>T</sup> (MRS-12, mye-11);<br><i>L. innocua</i> LMG 13568 (MRS-14, mye-11);<br><i>L. welshimeri</i> 15008 (MRS-10, mye-12) |
| <i>E. faecalis</i> 1188 | <i>L. sakei</i> ACA-DC 2313 (MRS-15, mye-18);<br><i>S. thermophilus</i> ACA-DC 4 (M17-15);<br><i>E. faecalis</i> LMG 11396 (mye-11)        | nd | <i>L. innocua</i> LMG 11387 <sup>T</sup> (MRS-13, mye-10);<br><i>L. innocua</i> LMG 13568 (MRS-14, mye-11);<br><i>L. welshimeri</i> 15008 (MRS-10, mye-12) |
| <i>E. faecalis</i> 1189 | <i>L. sakei</i> ACA-DC 2313 (MRS-12, mye-14);<br><i>S. thermophilus</i> ACA-DC 4 (M17-15);<br><i>E. faecalis</i> LMG 11396 (M17-9, mye-11) | nd | <i>L. innocua</i> LMG 11387 <sup>T</sup> (MRS-12, mye-16);<br><i>L. innocua</i> LMG 13568 (MRS-13, mye-16);<br><i>L. welshimeri</i> 15008 (MRS-9, mye-12)  |
| <i>E. faecalis</i> 1190 | <i>S. thermophilus</i> ACA-DC 4 (M17-15);<br><i>E. faecalis</i> LMG 11396 (M17-11)                                                         | nd |                                                                                                                                                            |

|                         |                                                                                                                                           |                                                                                             |                                                                                                                                                            |
|-------------------------|-------------------------------------------------------------------------------------------------------------------------------------------|---------------------------------------------------------------------------------------------|------------------------------------------------------------------------------------------------------------------------------------------------------------|
| <i>E. faecalis</i> 1191 | <i>S. thermophilus</i> ACA-DC 4 (M17-15);<br><i>E. faecalis</i> LMG 11396 (M17-9)                                                         | nd                                                                                          | nd                                                                                                                                                         |
| <i>E. faecium</i> 1197  | <i>S. thermophilus</i> ACA-DC 4 (M17-12)                                                                                                  | <i>S. oralis</i> LMG 14532 <sup>T</sup> (MRS 10; mye-10t)                                   | <i>L. welshimeri</i> 15008 (mye-7)                                                                                                                         |
| <i>E. faecium</i> 1198  | <i>S. thermophilus</i> ACA-DC 4 (M17-12)                                                                                                  | <i>S. oralis</i> LMG 14532 <sup>T</sup> (MRS-10t)                                           | <i>L. welshimeri</i> 15008 (mye-9)                                                                                                                         |
| <i>E. faecium</i> 1200  | <i>S. thermophilus</i> ACA-DC 4 (M17-12)                                                                                                  | <i>S. oralis</i> LMG 14532 <sup>T</sup> (MRS-10; mye-10t)                                   | <i>P. aeruginosa</i> FMCC B-26 (M17-bl)                                                                                                                    |
| <i>E. faecium</i> 1201  | <i>S. thermophilus</i> ACA-DC 4 (M17-12)                                                                                                  | nd                                                                                          | <i>P. aeruginosa</i> FMCC B-26 (mye-bl)                                                                                                                    |
| <i>E. faecalis</i> 1203 | <i>L. sakei</i> ACA-DC 2313 (M17-17; mye-14);<br><i>E. faecalis</i> LMG 11396 (M17-8, mye-8)                                              | nd                                                                                          | <i>L. innocua</i> LMG 11387 <sup>T</sup> (MRS-18, mye-11);<br><i>L. innocua</i> LMG 13568 (MRS-19, mye-12);<br><i>L. welshimeri</i> 15008 (MRS-13, mye-9)  |
| <i>E. faecalis</i> 1204 | <i>S. thermophilus</i> ACA-DC 4 (M17-7)                                                                                                   | nd                                                                                          | <i>P. aeruginosa</i> FMCC B-26 (mye-bl)                                                                                                                    |
| <i>E. faecium</i> 1214  | <i>S. thermophilus</i> ACA-DC 4 (M17-12)                                                                                                  | <i>S. oralis</i> LMG 14532 <sup>T</sup> (M17-9t)                                            | nd                                                                                                                                                         |
| <i>E. faecium</i> 1216  | <i>S. thermophilus</i> ACA-DC 4 (M17-12)                                                                                                  | nd                                                                                          | <i>P. aeruginosa</i> FMCC B-26 (mye-bl)                                                                                                                    |
| <i>E. faecium</i> 1217  | <i>S. thermophilus</i> ACA-DC 4 (M17-12)                                                                                                  | <i>S. sanguinis</i> DSM 20068 (M17-9t);<br><i>S. oralis</i> LMG 14532 <sup>T</sup> (M17-9t) | nd                                                                                                                                                         |
| <i>E. faecium</i> 1218  | <i>L. sakei</i> ACA-DC 2313 (M17-17, mye-15);<br><i>S. thermophilus</i> ACA-DC 44 (17-10);<br><i>E. faecalis</i> LMG 11396 (M17-9, mye-9) | <i>S. sanguinis</i> DSM 20068 (M17-9t)                                                      | <i>L. innocua</i> LMG 11387 <sup>T</sup> (M17-15, mye-7);<br><i>L. innocua</i> LMG 13568 (M17-15, mye-9);<br><i>L. welshimeri</i> 15008 (M17-10, mye-8)    |
| <i>E. faecium</i> 1219  | <i>L. sakei</i> ACA-DC 2313 (M17-17, mye-15);<br><i>S. thermophilus</i> ACA-DC 44 (17-10);<br><i>E. faecalis</i> LMG 11396 (M17-9, mye-9) | nd                                                                                          | <i>L. innocua</i> LMG 11387 <sup>T</sup> (M18-15, mye-12);<br><i>L. innocua</i> LMG 13568 (M17-15, mye-12);<br><i>Li. welshimeri</i> 15008 (M17-12, mye-9) |

|                         |                                                                                                                                           |                                                                                                       |                                                                                                                                                           |
|-------------------------|-------------------------------------------------------------------------------------------------------------------------------------------|-------------------------------------------------------------------------------------------------------|-----------------------------------------------------------------------------------------------------------------------------------------------------------|
| <i>E. faecium</i> 1220  | <i>L. sakei</i> ACA-DC 2313 (M17-15, mye-15);<br><i>S. thermophilus</i> ACA-DC 4 (M17-10);<br><i>E. faecalis</i> LMG 11396 (M17-9, mye-9) | nd                                                                                                    | <i>L. innocua</i> LMG 11387 <sup>T</sup> (M17-16, mye-14)<br><i>L. innocua</i> LMG 13568 (M17-16, mye-13);<br><i>L. welshimeri</i> 15008 (M17-12, mye-12) |
| <i>E. faecium</i> 1221  | <i>L. sakei</i> ACA-DC 2313 (M17-20, mye-15);<br><i>S. thermophilus</i> ACA-DC 4 (M17-10);<br><i>E. faecalis</i> LMG 11396 (M17-9, mye-9) | nd                                                                                                    | <i>L. innocua</i> LMG 11387 <sup>T</sup> (M17-16, mye-12)<br><i>L. innocua</i> LMG 13568 (M17-15, mye-12);<br><i>L. welshimeri</i> 15008 (M17-12, mye-9)  |
| <i>E. faecium</i> 1222  | <i>L. sakei</i> ACA-DC 2313 (M17-15, mye-15);<br><i>S. thermophilus</i> ACA-DC 4 (M17-10);<br><i>E. faecalis</i> LMG 11396 (M17-9, mye-9) | nd                                                                                                    | <i>L. innocua</i> LMG 11387 <sup>T</sup> (M17-14, mye-12);<br><i>L. innocua</i> LMG 13568 (M17-14, mye-10);<br><i>L. welshimeri</i> 15008 (M17-11, mye-9) |
| <i>E. faecium</i> 1233  | <i>S. thermophilus</i> ACA-DC 4 (MRS-12)                                                                                                  | <i>S. oralis</i> LMG 14532 <sup>T</sup> (M17-10t)                                                     | nd                                                                                                                                                        |
| <i>E. faecium</i> 1235  | <i>S. thermophilus</i> ACA-DC 4 (MRS-12)                                                                                                  | <i>S. oralis</i> LMG 14532 <sup>T</sup> (M17-10t)                                                     | nd                                                                                                                                                        |
| <i>E. faecium</i> 1268  | <i>S. thermophilus</i> ACA-DC 4 (M17-12)                                                                                                  | <i>S. pneumoniae</i> LMG 14545 <sup>T</sup> (M17-7)                                                   | nd                                                                                                                                                        |
| <i>H. paralvei</i> 1123 | nd                                                                                                                                        | <i>S. mutans</i> LMG 14558 <sup>T</sup> (MRS-9t);<br><i>S. oralis</i> LMG 14532 <sup>T</sup> (MRS-9t) | <i>L. innocua</i> LMG 11387 <sup>T</sup> (MRS-14, mye-10);<br><i>L. innocua</i> LMG 13568 (MRS-11, mye-9)                                                 |
| <i>H. paralvei</i> 1124 | <i>L. sakei</i> ACA-DC 2313 (MRS-15);<br><i>S. thermophilus</i> ACA-DC 4 (MRS-9)                                                          | nd                                                                                                    | <i>L. innocua</i> LMG 11387 <sup>T</sup> (MRS 18, mye-8);<br><i>L. innocua</i> LMG 13568 (MRS 18, mye-9);<br><i>L. welshimeri</i> 15008 (MRS-7)           |
| <i>H. paralvei</i> 1125 | nd                                                                                                                                        | nd                                                                                                    | <i>L. innocua</i> LMG 11387 <sup>T</sup> (MRS 15, mye-10);<br><i>L. innocua</i> LMG 13568 (MRS 12, mye-9)                                                 |
| <i>H. paralvei</i> 1126 | <i>S. thermophilus</i> ACA-DC 4 (MRS-11)                                                                                                  | <i>S. oralis</i> LMG 14532 <sup>T</sup> (MRS-8t)                                                      |                                                                                                                                                           |

|                              |                                                                                                                                                                                             |                                                                                                                                                                                                                                                                                                                                                                                                                                                                                                                                                                                                                                         |                                                                                                                                                            |
|------------------------------|---------------------------------------------------------------------------------------------------------------------------------------------------------------------------------------------|-----------------------------------------------------------------------------------------------------------------------------------------------------------------------------------------------------------------------------------------------------------------------------------------------------------------------------------------------------------------------------------------------------------------------------------------------------------------------------------------------------------------------------------------------------------------------------------------------------------------------------------------|------------------------------------------------------------------------------------------------------------------------------------------------------------|
| <i>H. paralvei</i> 1127      | <i>L. sakei</i> ACA-DC 2313 (MRS-18, mye-14);<br><i>S. thermophilus</i> (MRS-11)                                                                                                            | <i>S. oralis</i> LMG 14532 <sup>T</sup> (MRS-8t);<br><i>S. pneumoniae</i> LMG 14545 <sup>T</sup> (MRS-8t)                                                                                                                                                                                                                                                                                                                                                                                                                                                                                                                               | <i>L. innocua</i> LMG 11387 <sup>T</sup> (MRS 20, mye-15);<br><i>L. innocua</i> LMG 13568 (MRS 20, mye-15);<br><i>L. welshimeri</i> 15008 (MRS 14, mye-12) |
| <i>Pseudomonas</i> spp. 1146 | nd                                                                                                                                                                                          | nd                                                                                                                                                                                                                                                                                                                                                                                                                                                                                                                                                                                                                                      | <i>B. subtilis</i> FMCC B-109 (MRS-11);<br><i>B. cereus</i> LMG 6923 <sup>T</sup> (mye-10t)                                                                |
| <i>Pseudomonas</i> spp. 1192 | <i>L. lactis</i> LMG 6890 <sup>T</sup> (MRS-7, mye-9);<br><i>S. thermophilus</i> ACA-DC 4 (MRS-11, mye-9);<br><i>E. faecalis</i> LMG 11396 (MRS-9, mye-9)                                   | <i>S. salivarius</i> LMG 11489 <sup>T</sup> (MRS-8, mye-10);<br><i>S. sanguinis</i> DSM 20068 (MRS-13, mye-14);<br><i>S. sobrinus</i> LMG 14641 <sup>T</sup> (MRS-10, mye-11);<br><i>S. gordonii</i> LMG 14518 <sup>T</sup> (MRS-12, mye-13);<br><i>S. mutans</i> LMG 14558 <sup>T</sup> (MRS-10, mye-11);<br><i>S. oralis</i> LMG 14532 <sup>T</sup> (MRS-10, mye-12);<br><i>S. agalactiae</i> LMG 14694 <sup>T</sup> (MRS-10, mye-12);<br><i>S. anginosus</i> LMG 14502 <sup>T</sup> (MRS-9, mye-11);<br><i>S. pneumoniae</i> LMG 14545 <sup>T</sup> (MRS-11, mye-12);<br><i>S. pyogenes</i> LMG 21599 <sup>T</sup> (MRS-11, mye-13); | <i>L. welshimeri</i> 15008 (MRS-7, mye-9);<br><i>B. subtilis</i> FMCC B-109 (mye-8);<br><i>B. cereus</i> LMG 6923 <sup>T</sup> (mye-15)                    |
| <i>Pseudomonas</i> spp. 1195 | <i>L. sakei</i> ACA-DC 2313 (mye-7);<br><i>L. lactis</i> LMG 6890 <sup>T</sup> (MRS-7, mye-9);<br><i>S. thermophilus</i> ACA-DC 4 (MRS-12, mye-10);<br><i>E. faecalis</i> LMG 11396 (mye-8) | <i>S. salivarius</i> LMG 11489 <sup>T</sup> (MRS-10, mye-12);<br><i>S. sanguinis</i> DSM 20068 (MRS-10, mye-13);<br><i>S. sobrinus</i> LMG 14641 <sup>T</sup> (MRS-10, mye-12);<br><i>S. gordonii</i> LMG 14518 <sup>T</sup> (MRS-9, mye-13);<br><i>S. mutans</i> LMG 14558 <sup>T</sup> (MRS-10, mye14);<br><i>S. oralis</i> LMG 14532 <sup>T</sup> (MRS-14, mye-15);                                                                                                                                                                                                                                                                  | <i>L. welshimeri</i> 15008 (MRS-9, mye-12)                                                                                                                 |

|                              |                                                                                               |                                                                                                                                                                                                                                                              |                                    |
|------------------------------|-----------------------------------------------------------------------------------------------|--------------------------------------------------------------------------------------------------------------------------------------------------------------------------------------------------------------------------------------------------------------|------------------------------------|
|                              |                                                                                               | <i>S. agalactiae</i> LMG 14694 <sup>T</sup> (MRS-10, mye-14);<br><i>S. anginosus</i> LMG 14502 <sup>T</sup> (MRS-8, mye-11);<br><i>S. pneumoniae</i> LMG 14545 <sup>T</sup> (MRS-11, mye-13);<br><i>S. pyogenes</i> LMG 21599 <sup>T</sup> (MRS-10, mye-13); |                                    |
| <i>Pseudomonas</i> spp. 1212 | <i>S. thermophilus</i> ACA-DC 4 (M17-12)                                                      | <i>S. sanguinis</i> DSM 20068 (MRS-10t);<br><i>S. sobrinus</i> LMG 14641 <sup>T</sup> (MRS-8t);<br><i>S. pneumoniae</i> LMG 14545 <sup>T</sup> (MRS-10)                                                                                                      | nd                                 |
| <i>B. subtilis</i> 1176      | <i>L. lactis</i> LMG 6890 <sup>T</sup> (mye-12t);<br><i>S. thermophilus</i> ACA-DC 4 (MRS-15) | <i>S. agalactiae</i> LMG 14694 <sup>T</sup> (MRS-8);<br><i>S. pneumoniae</i> LMG 14545 <sup>T</sup> (MRS-10t)                                                                                                                                                | nd                                 |
| <i>B. subtilis</i> 1225      | <i>S. thermophilus</i> ACA-DC 4 (MRS-12)                                                      | <i>S. pneumoniae</i> LMG 14545 <sup>T</sup> (MRS-10)                                                                                                                                                                                                         | nd                                 |
| <i>B. subtilis</i> 1241      | <i>L. sakei</i> ACA-DC 2313 (MRS-14);<br><i>S. thermophilus</i> ACA-DC 4 (MRS-12)             | <i>S. oralis</i> LMG 14532 <sup>T</sup> (MRS-7t)                                                                                                                                                                                                             | <i>L. welshimeri</i> 15008 (MRS-8) |
| <i>B. subtilis</i> 1242      | <i>L. sakei</i> ACA-DC 2313 (MRS-12);<br><i>S. thermophilus</i> ACA-DC 4 (MRS-12)             | <i>S. oralis</i> LMG 14532 <sup>T</sup> (MRS 8);<br><i>S. pneumoniae</i> LMG 14545 <sup>T</sup> (MRS-11)                                                                                                                                                     | nd                                 |
| <i>B. subtilis</i> 1243      | <i>S. thermophilus</i> ACA-DC 4 (MRS-12)                                                      | <i>S. pneumoniae</i> LMG 14545 <sup>T</sup> (MRS-9)                                                                                                                                                                                                          | nd                                 |
| <i>B. subtilis</i> 1244      | <i>L. sakei</i> ACA-DC 2313 (MRS-17);<br><i>S. thermophilus</i> ACA-DC 4 (MRS-12)             | <i>S. oralis</i> LMG 14532 <sup>T</sup> (MRS-8)                                                                                                                                                                                                              | nd                                 |

bl: border line inhibition, t: turbid inhibition zone, mye: milk supplemented with yeast extract, nd: not detected.
